# Supplementary material for: Fast and facile preparation of S nanoparticles by flash nanoprecipitation for lithium–sulfur batteries
Source: Royal Society of Chemistry journal article supplement (doi:10.1039/c9nj05035c), 2019-11-27
Supplement: c9nj05035c1.pdf [file c9nj05035c1.pdf]

# Supplementary Information

## Fast and Facile Preparation of S Nanoparticle by Flash Nanoprecipitation for Lithium-sulfur Battery

Zhouliang Tan<sup>1</sup>, Yulin Shi<sup>1\*</sup>, Tingting Wei<sup>1</sup>, Xin Jia<sup>1</sup>, Yin Lv<sup>1</sup>, Long Chen<sup>1\*</sup>, Xuhong  
Guo<sup>1,2\*</sup>

<sup>1</sup>Engineering Research Center of Materials Chemical Engineering of Xinjiang  
Bingtuan, School of Chemistry and Chemical Engineering, Shihezi University,  
Shihezi, 832003, P.R. China.

<sup>2</sup>International Joint Research Center of Green Energy Chemical Engineering, East  
China University of Science and Technology, Shanghai, 200237, P.R. China.

\* E-mail: shiyulin@shzu.edu.cn (Yulin Shi), chenlong2012@sinano.ac.cn (Long  
Chen), guoxuhong@ecust.edu.cn (Xuhong Guo)

Table S1. Sulfur loading percentage of Li-S batteries based on various hollow structured sulfur hosts.

| Host materials                | S content  | Ref.          |
|-------------------------------|------------|---------------|
| S-x                           | 99 wt. %   | In this paper |
| HCS                           | 70 wt. %   | 1             |
| Multi shelled HCS             | 86 wt. %   | 2             |
| Yolk-Shell S@TiO <sub>2</sub> | 71 wt. %   | 3             |
| Yolk-Shell S@PANI             | 82 wt. %   | 4             |
| S@PTh                         | 71.9 wt. % | 5             |
| TiO@C-HS                      | 70 wt. %   | 6             |
| SCSPs/mrGO                    | 90 wt. %   | 7             |
| S/PPy-MnO <sub>2</sub>        | 70 wt. %   | 8             |

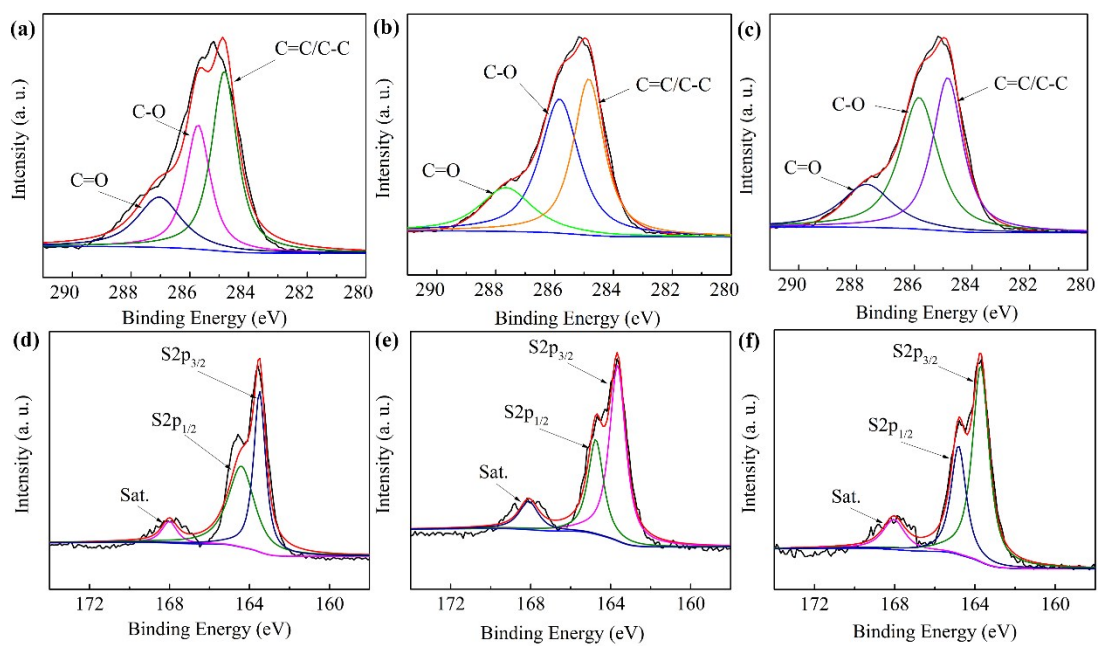

**Figure S1** XPS spectra of S-x. C 1s spectra of (a) S-20, (b) S-50, (c) S-80. S 2p spectra of (d) S-20, (e) S-50, (f) S-80.

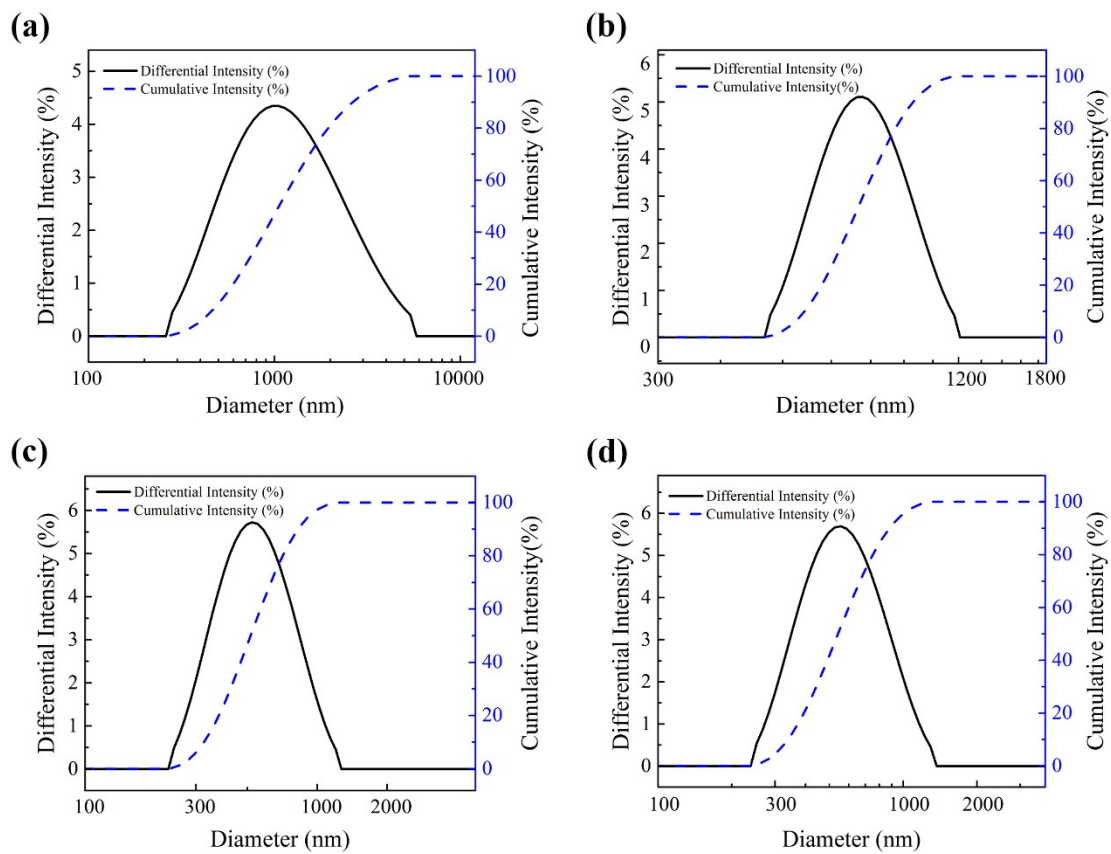

**Figure S2** DLS size distribution of (a) S-20, (b) S-50, (c) S-80, (d) S-110

**Table S2.** Physical Parameters for S-x

---

| Sample | Speed | R <sub>e</sub> | DLS size (nm) | PDI   |
|--------|-------|----------------|---------------|-------|
| 1      | 20    | 672.7          | 1036.7        | 0.340 |
| 2      | 50    | 1849.9         | 763.1         | 0.109 |
| 3      | 80    | 3228.9         | 532.4         | 0.076 |
| 4      | 110   | 4809.7         | 507.9         | 0.068 |

---

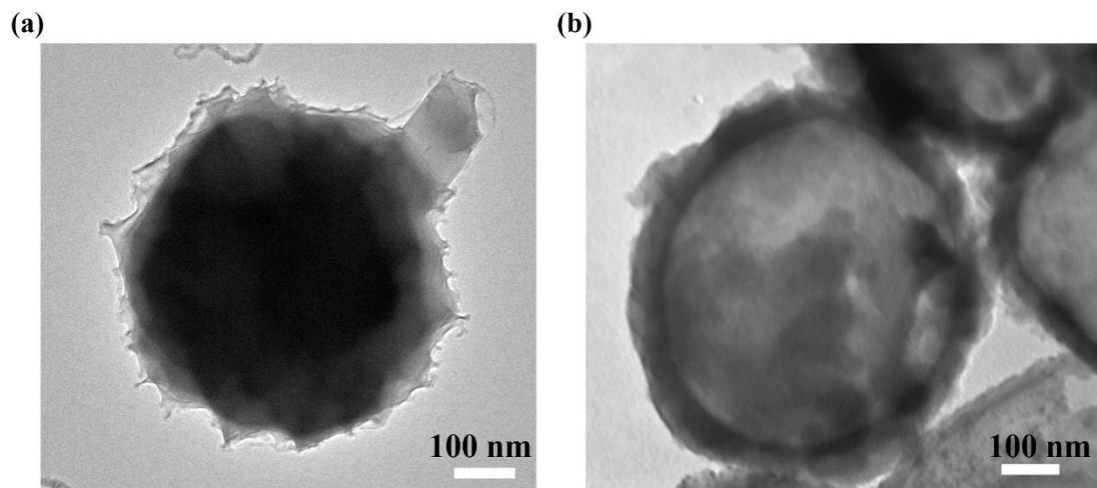

**Figure S3** TEM images of (a) S-110 and (b) S-110 after being heated at 155 °C for 5 h

**Table S3.** Electrochemical performance of Lithium-Sulfur batteries based on various hollow structured sulfur hosts

| Host materials                   | Cycle capacity (mAh g <sup>-1</sup> ) |           |                                    | Ref.         |
|----------------------------------|---------------------------------------|-----------|------------------------------------|--------------|
|                                  | Initial                               | Retention | Current density                    |              |
| S-110                            | 1030.7                                | 807.7     | 50 cycles at 0.1C                  | In this work |
| Sulphur-TiO <sub>2</sub>         | 1030                                  | 690       | 1000 cycles at 0.5C                | 9            |
| Polyaniline-Coated Sulfur        | 1101                                  | 765       | 200 cycles at 0.2C                 | 10           |
| Sulfur/Polythiophene             | 1119.3                                | 830.2     | 80 cycles at 0.1 A g <sup>-1</sup> | 11           |
| Polyaniline-Coated Sulfur/Carbon | 1405                                  | 596       | 100 cycles at 0.1C                 | 12           |
| Sulfur/Carbon                    | 1285                                  | 750       | 500 cycles at 0.2C                 | 13           |
| SiO <sub>2</sub> -coated sulfur  | 1420                                  | 763       | 50 cycles at 0.1C                  | 14           |
| Hollow Carbon-Sulfur             | 1070                                  | 900       | 150 cycles at 0.2C                 | 15           |

**Table S4.** The EIS spectra fitting of the S-x cathode.

---

| Sample | $R_s$ ( $\Omega$ ) | $R_{ct}$ ( $\Omega$ ) |
|--------|--------------------|-----------------------|
| S-20   | 7.6                | 62.5                  |
| S-50   | 5.08               | 78.2                  |
| S-80   | 4.375              | 55.5                  |
| S-110  | 2.105              | 15.5                  |

---



## References

1. S.A. Ahad, P. Ragupathy, S. Ryu, H.-W. Lee, D.K. Kim, *Chem. Commun.* 53 (2017) 8782-8785.
2. S. Chen, X. Huang, B. Sun, J. Zhang, H. Liu, G. Wang, *J. Mater. Chem. A*, 2 (2014) 16199-16207.
3. Z. Wei Seh, W. Li, J.J. Cha, G. Zheng, Y. Yang, M.T. McDowell, P.-C. Hsu, Y. Cui, *Nat. Commun.* 4 (2013) 1331.
4. Y.Y. Weidong Zhou, Hao Chen, Francis J. DiSalvo and Héctor D. Abruña, *J. Am. Chem. Soc.*, 135 (2013).
5. F. Wu, J. Chen, R. Chen, S. Wu, L. Li, S. Chen, T. Zhao, *J. Phy. Chem. C* 115 (2011) 6057-6063.
6. Z. Li, J. Zhang, B. Guan, D. Wang, L.-M. Liu, X.W. Lou, *Nat. Commun.* , 7 (2016) 13065.
7. B. Campbell, J. Bell, H. Hosseini Bay, Z. Favors, R. Ionescu, C.S. Ozkan, M. Ozkan, *Nanoscale* , 7 (2015) 7051-7055.
8. J. Zhang, Y. Shi, Y. Ding, W. Zhang, G. Yu, *Nano Lett.* , 16 (2016) 7276-7281.
9. Z. Wei Seh, W. Li, J. J. Cha, G. Zheng, Y. Yang, M. T. McDowell, P.-C. Hsu and Y. Cui, *Nat. Commun.*, 2013, 4, 1331.
10. W. Zhou, Y. Yu, H. Chen, F. J. DiSalvo and H. D. Abruña, *J. Am. Chem. Soc.*, 2013, 135, 16736-16743.
11. F. Wu, J. Chen, R. Chen, S. Wu, L. Li, S. Chen and T. Zhao, *J. Phys. Chem. C*, 2011, 115, 6057-6063.
12. G.-C. Li, G.-R. Li, S.-H. Ye and X.-P. Gao, *Adv. Energy Mater.*, 2012, 2, 1238-1245.
13. Z. Li, J. Zhang, B. Guan, D. Wang, L.-M. Liu and X. W. Lou, *Nat. Commun.*, 2016, 7, 13065.
14. B. Campbell, J. Bell, H. Hosseini Bay, Z. Favors, R. Ionescu, C. S. Ozkan and M. Ozkan, *Nanoscale*, 2015, 7, 7051-7055.
15. W. Zhou, X. Xiao, M. Cai and L. Yang, *Nano Lett.*, 2014, 14, 5250-5256.
